# Supplementary material for: Evolution of respiratory syncytial virus genotype BA in Kilifi, Kenya, 15 years on
Source: PubMed Central journal article supplement (PMC7712891; doi:10.1038/s41598-020-78234-0), 2020-12-03

## **Evolution of Respiratory Syncytial Virus genotype BA in Kilifi, Kenya, 15 years on**

Everlyn Kamau<sup>a,‡,\*</sup>, James R. Otieno<sup>a,§</sup>, Clement S. Lewa<sup>a</sup>, Anthony Mwema<sup>a</sup>, Nickson Murunga<sup>a</sup>, D. James Nokes<sup>a,b</sup> and Charles N. Agoti<sup>a,c</sup>

<sup>a</sup> Epidemiology and Demography Department, Kenya Medical Research Institute (KEMRI) – Wellcome Trust Research Programme, Kilifi, Kenya

<sup>b</sup> School of Life Sciences and Zeeman Institute (SBIDER), University of Warwick, Coventry, UK

<sup>c</sup> School of Health and Human Sciences, Pwani University, Kilifi, Kenya

<sup>‡</sup> Present address: Nuffield Department of Medicine, University of Oxford, Oxford, UK

<sup>§</sup> Present address: Fogarty International Center, NIH, Bethesda, MD, USA

\* [everlyn.kamau@ndm.ox.ac.uk](mailto:everlyn.kamau@ndm.ox.ac.uk)

---

**Supplementary Figure S1** Site-wise differences between the non-synonymous ( $\beta$ ) and synonymous ( $\alpha$ ) substitution rates in the analyzed G glycoprotein region.

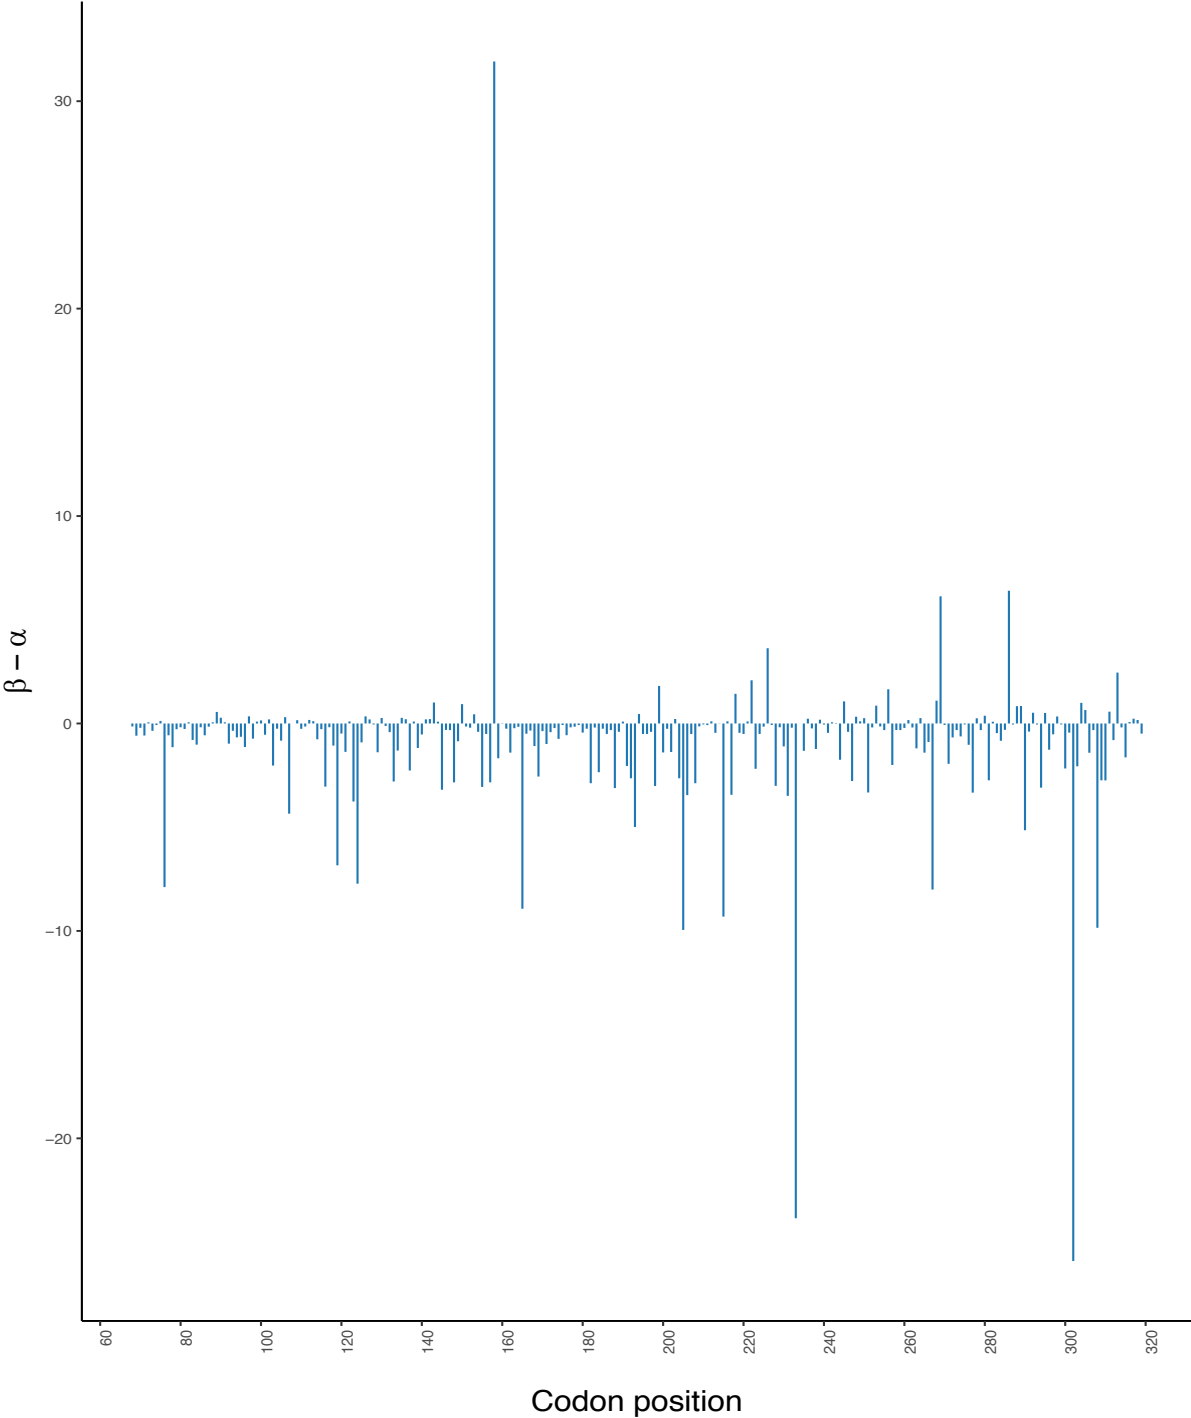

Supplement: 41598_2020_78234_MOESM1_ESM.pdf [file 41598_2020_78234_MOESM1_ESM.pdf]
